# Supplementary material
Source: publisher figshare collection journal article supplement (https://sage.figshare.com/ndownloader/files/12891110)
Supplement: Supplementary file 1 [file 12891110]

**Supplementary Material:** Predictors of Sexual Aggression Perpetration among Male and Female College Students: Cross-Cultural Evidence from Chile and Turkey

**1) Prevalence Rates of Sexual Aggression Perpetration (Three-Level Sexual Aggression Score)**

Table SM1

*Sexual Aggression Perpetration in Percent at Both Measurement Waves, Broken Down by Country Sample and Gender*

|                              | T1             |         |                |         | T2             |        |                |      |
|------------------------------|----------------|---------|----------------|---------|----------------|--------|----------------|------|
|                              | Chilean sample |         | Turkish sample |         | Chilean sample |        | Turkish sample |      |
|                              | female         | male    | female         | male    | female         | male   | female         | male |
| No perpetration              | 82.6***        | 69.5*** | 82.4***        | 66.9*** | 92.2           | 82.4   | 78.1           | 73.4 |
| Sexual coercion <sup>1</sup> | 8.6            | 11.3    | 8.1            | 12.6    | 4.2            | 5.4    | 8.8            | 11.4 |
| Attempted rape and rape      | 8.8***         | 19.2*** | 9.5***         | 20.5*** | 3.6**          | 12.2** | 13.1           | 15.2 |

*Note:* <sup>1</sup>Participants who reported sexual contact, attempted sexual coercion, or coercion. \*\*  $p < .01$ ; \*\*\*  $p < .001$ .

## 2) Measurement Invariance across Countries

Table SM2

*Measurement Invariance across Chilean and Turkish Participants*

|                                                    | $\chi^2$    | df  | RMSEA<br>[90% CI]    | TLI   | CFI   | $\Delta$ CFI |
|----------------------------------------------------|-------------|-----|----------------------|-------|-------|--------------|
| <b><i>Risk elements in sexual scripts</i></b>      |             |     |                      |       |       |              |
| configural                                         | 391.676***  | 116 | 0.049 [0.044, 0.054] | 0.947 | 0.966 | -            |
| metric                                             | 456.113***  | 129 | 0.051 [0.046, 0.056] | 0.944 | 0.960 | -.006        |
| scalar                                             | 1013.641*** | 142 | 0.079 [0.074, 0.083] | 0.863 | 0.893 | -.067        |
| partial scalar                                     | 544.126***  | 137 | 0.055 [0.050, 0.060] | 0.934 | 0.950 | -.010        |
| <b><i>Normative acceptance of risk factors</i></b> |             |     |                      |       |       |              |
| configural                                         | 353.429***  | 92  | 0.054 [0.048, 0.060] | 0.958 | 0.971 | -            |
| metric                                             | 431.032***  | 103 | 0.057 [0.051, 0.062] | 0.953 | 0.964 | -.007        |
| scalar                                             | 1104.622*** | 114 | 0.094 [0.089, 0.099] | 0.873 | 0.890 | -.074        |
| partial scalar                                     | 508.551***  | 111 | 0.060 [0.055, 0.065] | 0.948 | 0.956 | -.008        |
| <b><i>Sexual self-esteem</i></b>                   |             |     |                      |       |       |              |
| configural                                         | 189.620***  | 66  | 0.043 [0.036, 0.051] | 0.938 | 0.963 | -            |
| metric                                             | 246.169***  | 76  | 0.048 [0.041, 0.054] | 0.925 | 0.948 | -.015        |
| partial metric                                     | 218.247***  | 75  | 0.044 [0.037, 0.051] | 0.936 | 0.957 | -.006        |
| scalar <sup>1</sup>                                | 668.300***  | 85  | 0.083 [0.077, 0.089] | 0.771 | 0.823 | -.134        |
| partial scalar                                     | 247.754***  | 80  | 0.046 [0.040, 0.053] | 0.930 | 0.949 | -.008        |
| <b><i>Initiation assertiveness</i></b>             |             |     |                      |       |       |              |
| configural                                         | 8.580*      | 2   | 0.058 [0.022, 0.100] | 0.969 | 0.990 | -            |
| metric                                             | 5.292       | 3   | 0.028 [0.000, 0.066] | 0.993 | 0.996 | +.006        |
| scalar                                             | 126.634***  | 5   | 0.157 [0.134, 0.181] | 0.773 | 0.811 | -.185        |
| partial scalar                                     | 5.963       | 4   | 0.022 [0.000, 0.057] | 0.995 | 0.997 | +.001        |

*Note:* <sup>1</sup> The constraint on one loading was released; \* $p < .05$ , \*\*\*  $p < .001$ .

### 3) Measurement Invariance across Gender Groups

Table SM3

#### *Measurement Invariance across Male and Female Participants*

|                                                    | $\chi^2$    | df  | RMSEA<br>[90% CI]    | TLI   | CFI   | $\Delta$ CFI |
|----------------------------------------------------|-------------|-----|----------------------|-------|-------|--------------|
| <b><i>Risk elements in sexual scripts</i></b>      |             |     |                      |       |       |              |
| configural                                         | 382.312***  | 116 | 0.048 [0.043, 0.054] | 0.951 | 0.969 | -            |
| metric                                             | 443.375***  | 129 | 0.050 [0.045, 0.055] | 0.948 | 0.963 | -.006        |
| scalar                                             | 1396.332*** | 142 | 0.094 [0.090, 0.099] | 0.811 | 0.853 | -.110        |
| partial scalar                                     | 539.047***  | 137 | 0.054 [0.050, 0.059] | 0.937 | 0.953 | -.010        |
| <b><i>Normative acceptance of risk factors</i></b> |             |     |                      |       |       |              |
| configural                                         | 346.130***  | 92  | 0.053 [0.047, 0.059] | 0.959 | 0.972 | -            |
| metric                                             | 373.165***  | 103 | 0.051 [0.046, 0.057] | 0.961 | 0.970 | -.002        |
| scalar                                             | 506.681***  | 114 | 0.059 [0.054, 0.064] | 0.949 | 0.956 | -.014        |
| partial scalar                                     | 469.186***  | 112 | 0.057 [0.051, 0.062] | 0.953 | 0.960 | -.010        |
| <b><i>Sexual self-esteem</i></b>                   |             |     |                      |       |       |              |
| configural                                         | 245.276***  | 66  | 0.052 [0.045, 0.059] | 0.908 | 0.945 | -            |
| metric                                             | 263.360***  | 76  | 0.050 [0.043, 0.057] | 0.917 | 0.942 | -.003        |
| scalar                                             | 492.112***  | 86  | 0.069 [0.063, 0.075] | 0.840 | 0.875 | -.067        |
| partial scalar                                     | 300.140***  | 84  | 0.051 [0.045, 0.057] | 0.913 | 0.933 | -.009        |
| <b><i>Initiation assertiveness</i></b>             |             |     |                      |       |       |              |
| configural                                         | 0.838       | 2   | 0.000 [0.000, 0.049] | 1.005 | 1.000 | -            |
| metric                                             | 2.042       | 3   | 0.000 [0.000, 0.046] | 1.003 | 1.000 | .000         |
| scalar                                             | 158.868***  | 5   | 0.176 [0.153, 0.200] | 0.715 | 0.762 | -.238        |
| partial scalar                                     | 53.453***   | 4   | 0.112 [0.086, 0.139] | 0.885 | 0.924 | -.076        |

Note: \*\*\*  $p < .001$ .

#### 4) Complete List of Indirect Paths

Table SM4

*Standardized Indirect Paths to Sexual Aggression Perpetration at T2*

| <b>Indirect paths</b>                                                                                      | <b>Chilean sample</b> | <b>Turkish sample</b> |
|------------------------------------------------------------------------------------------------------------|-----------------------|-----------------------|
| Risky sexual behavior T1 → Perpetration T1 → Perpetration T2                                               | .04* [.007, .073]     | .03** [.001, .079]    |
| Risky sexual scripts T1 → Risky sexual behavior T1 → Perpetration T1 → Perpetration T2                     | .02* [.003, .034]     | .01** [.001, .037]    |
| Risky sexual scripts T1 → Risky sexual behavior T1 → Perpetration T2                                       | .03 [-.017, .080]     | .04 [-.027, .117]     |
| Risky sexual scripts T1 → Initiation assertiveness T1 → Perpetration T1 → Perpetration T2                  | .00 [-.001, .003]     | .00 [.000, .006]      |
| Risky sexual scripts T1 → Initiation assertiveness T1 → Perpetration T2                                    | -.00 [-.018, .012]    | .00 [-.009, .014]     |
| Initiation assertiveness T1 → Perpetration T1 → Perpetration T2                                            | .00 [-.006, .019]     | .03** [.001, .067]    |
| Sexual self-esteem T1 → Perpetration T1 → Perpetration T2                                                  | -.02* [-.053, -.004]  | -.03** [-.079, -.002] |
| Sexual self-esteem T1 → Initiation assertiveness T1 → Perpetration T1 → Perpetration T2                    | .00 [-.002, .007]     | .01** [.001, .029]    |
| Sexual self-esteem T1 → Initiation assertiveness T1 → Perpetration T2                                      | -.00 [-.045, .032]    | .01 [-.054, .061]     |
| Sexual self-esteem T1 → Risky sexual behavior T1 → Perpetration T1 → Perpetration T2                       | -.00 [-.007, .000]    | -.00 [-.006, .000]    |
| Sexual self-esteem T1 → Risky sexual behavior T1 → Perpetration T2                                         | -.00 [-.017, .001]    | -.01 [-.025, .002]    |
| Religiosity T1 → Risky sexual scripts T1 → Risky sexual behavior T1 → Perpetration T1 → Perpetration T2    | -.004* [-.008, -.001] | -.01* [-.010, -.001]  |
| Religiosity T1 → Risky sexual scripts T1 → Risky sexual behavior T1 → Perpetration T2                      | -.01 [-.019, .004]    | -.02 [-.039, .009]    |
| Religiosity T1 → Risky sexual scripts T1 → Initiation assertiveness T1 → Perpetration T1 → Perpetration T2 | .00 [-.001, .000]     | -.00 [-.002, .000]    |
| Religiosity T1 → Risky sexual scripts T1 → Initiation assertiveness T1 → Perpetration T2                   | .00 [-.003, .004]     | .00 [-.005, .003]     |
| Religiosity T1 → Sexual self-esteem T1 → Perpetration T1 → Perpetration T2                                 | -.00 [-.004, .000]    | .01* [.001, .014]     |
| Religiosity T1 → Sexual self-esteem T1 → Perpetration T2                                                   | -.00 [-.018, .002]    | .00 [-.019, .029]     |
| Religiosity T1 → Sexual self-esteem T1 → Initiation assertiveness T1 → Perpetration T1 → Perpetration T2   | .00 [.000, .000]      | -.00 [-.005, .000]    |

| <b>Indirect paths</b>                                                                                    | <b>Chilean sample</b> | <b>Turkish sample</b> |
|----------------------------------------------------------------------------------------------------------|-----------------------|-----------------------|
| Religiosity T1 → Sexual self-esteem T1 → Initiation assertiveness T1 → Perpetration T2                   | .00 [-.003, .001]     | -.00 [-.012, .010]    |
| Religiosity T1 → Sexual self-esteem T1 → Risky sexual behavior T1 → Perpetration T1<br>→ Perpetration T2 | .00 [.000, .000]      | .00 [.000, .001]      |
| Religiosity T1 → Sexual self-esteem T1 → Risky sexual behavior T1 → Perpetration T2                      | .00 [-.001, .000]     | .00 [.000, .005]      |
| Religiosity T1 → Initiation assertiveness T1 → Perpetration T1 → Perpetration T2                         | .00 [.000, .001]      | -.00 [-.004, .000]    |
| Religiosity T1 → Initiation assertiveness T1 → Perpetration T2                                           | .00 [-.010, .003]     | -.00 [-.011, .004]    |
| Religiosity T1 → Risky sexual behavior T1 → Perpetration T1 → Perpetration T2                            | .00 [-.001, .004]     | .00 [-.001, .006]     |
| Religiosity T1 → Risky sexual behavior T1 → Perpetration T2                                              | .00 [-.001, .012]     | .00 [-.002, .023]     |

*Note:* \*  $p < 0.05$  [95% CI]; \*\*  $p < 0.01$  [99% CI].
